# Supplementary material for: IRMPD spectroscopy of protonated S-nitrosocaptopril, a biologically active, synthetic amino acid
Source: Royal Society of Chemistry journal article supplement (doi:10.1039/c0cp00671h), 2010-01-01
Supplement: c0cp00671h.pdf [file c0cp00671h.pdf]

Supplementary information for :

## **IRMPD spectroscopy of gaseous protonated S-nitrosocaptopril, a biologically active, synthetic amino acid**

Cecilia Coletti,<sup>a</sup> Nazzareno Re,<sup>a</sup> Debora Scuderi,<sup>b</sup> Philippe Maître,<sup>b</sup> Barbara Chiavarino,<sup>c</sup>  
Simonetta Fornarini,<sup>c</sup> Francesco Lanucara,<sup>c,d</sup> Rajeev K. Sinha,<sup>c,e</sup> Maria Elisa Crestoni,<sup>\*c</sup>

<sup>a</sup> Dr. C. Coletti, Prof. N. Re  
*Dipartimento di Scienze del Farmaco*  
*Università G. D'Annunzio,*  
*Via dei Vestini, 31*  
*I-66100 Chieti (Italy)*

<sup>b</sup> Dr. P. Maître, Dr. D. Scuderi  
*Laboratoire de Chimie Physique, UMR8000 Université Paris-Sud 11*  
*Faculté des Sciences d'Orsay*  
*Bâtiment 350, 91405 Orsay Cedex (France)*

<sup>c</sup> Dr. B. Chiavarino, Prof. M. E. Crestoni, Prof. S. Fornarini, Dr. F. Lanucara, Dr. R. K. Sinha  
*Dipartimento di Chimica e Tecnologia del Farmaco*  
*Università di Roma "La Sapienza"*  
*P.le A. Moro 5, I-00185, Roma (Italy)*  
*E-mail: [mariaelisa.crestoni@uniroma1.it](mailto:mariaelisa.crestoni@uniroma1.it)*  
*Fax: +39 06 4991 3602;*  
*Te: +39 06 4991 3510*

<sup>d</sup> Dr. F. Lanucara  
*Present address:*  
*School of Chemistry, University of Manchester*  
*Manchester Interdisciplinary Biocentre*  
*131 Princess Street, Manchester M1 7ND (UK)*

<sup>e</sup> Dr. R. K. Sinha  
*Present address:*  
*Department of Chemistry and Biochemistry*  
*University of Bern*  
*Freistrasse 3*  
*CH-3012 Bern (Switzerland)*

### **Contents:**

- Figures S1-S6
- Reference of Gaussian 03

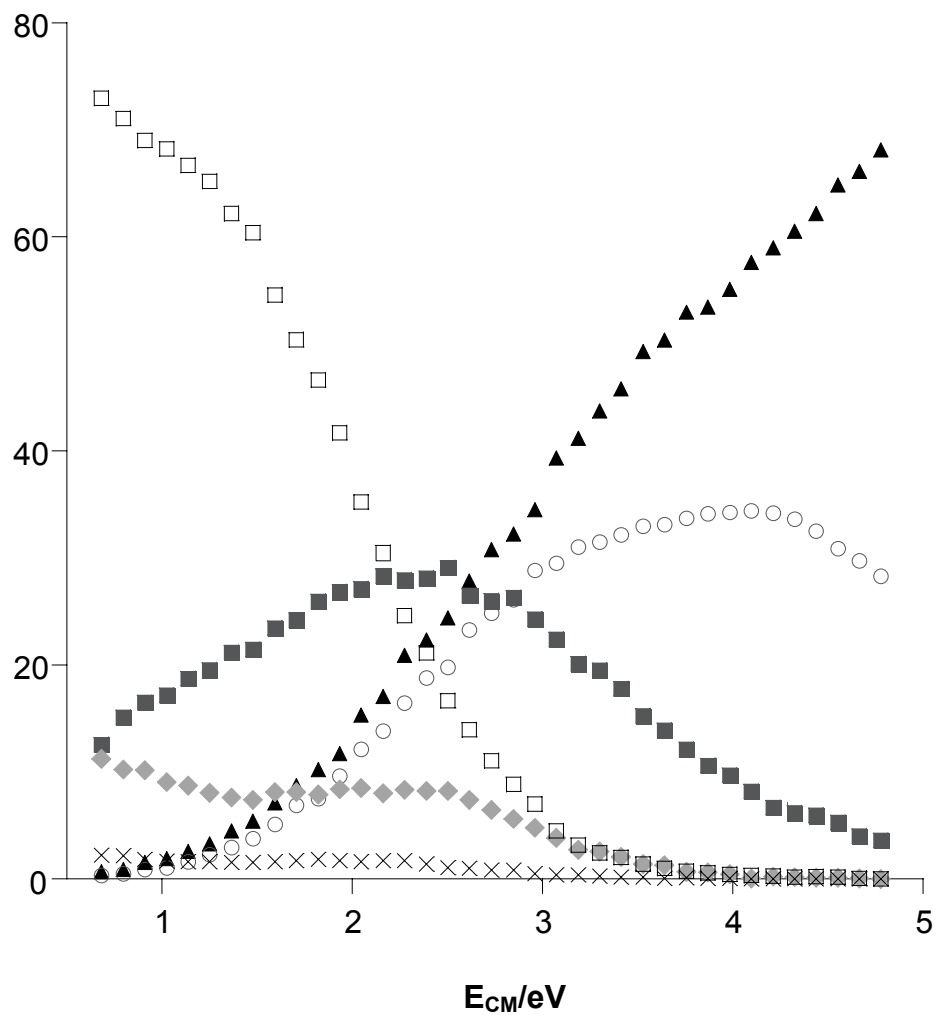

**Figure S1** CID breakdown graph of mass selected  $\text{capH}^+$  ions ( $\square$ ,  $m/z$  218) to afford ions at  $m/z$  200 ( $\times$ ), 172 ( $\blacksquare$ ), 116 ( $\blacklozenge$ ), and, at higher energies, 70 ( $\blacktriangle$ ) and 75 ( $\circ$ ).

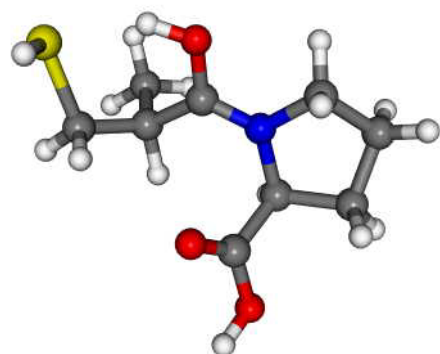

**CO-T2**  
(2.6 kJ/mol)

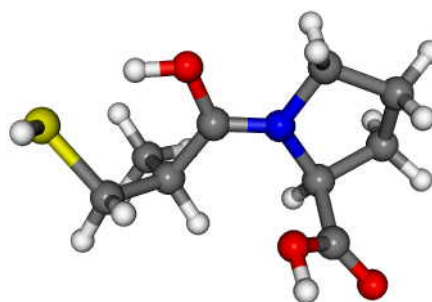

**CO-T3**  
(12.1 kJ/mol)

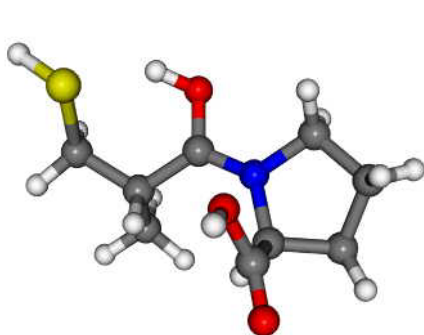

**CO-T4**  
(35.0 kJ/mol)

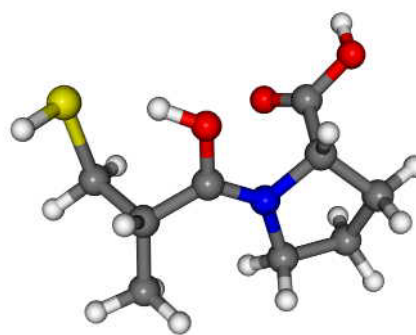

**CO-C2**  
(23.2 kJ/mol)

**Figure S2** Optimized structures for low energy conformers of structure **CO-T1** of capH<sup>+</sup>.  $\Delta H_{\text{rel}}^0$  relative values (reported in parentheses) are in kJ/mol.

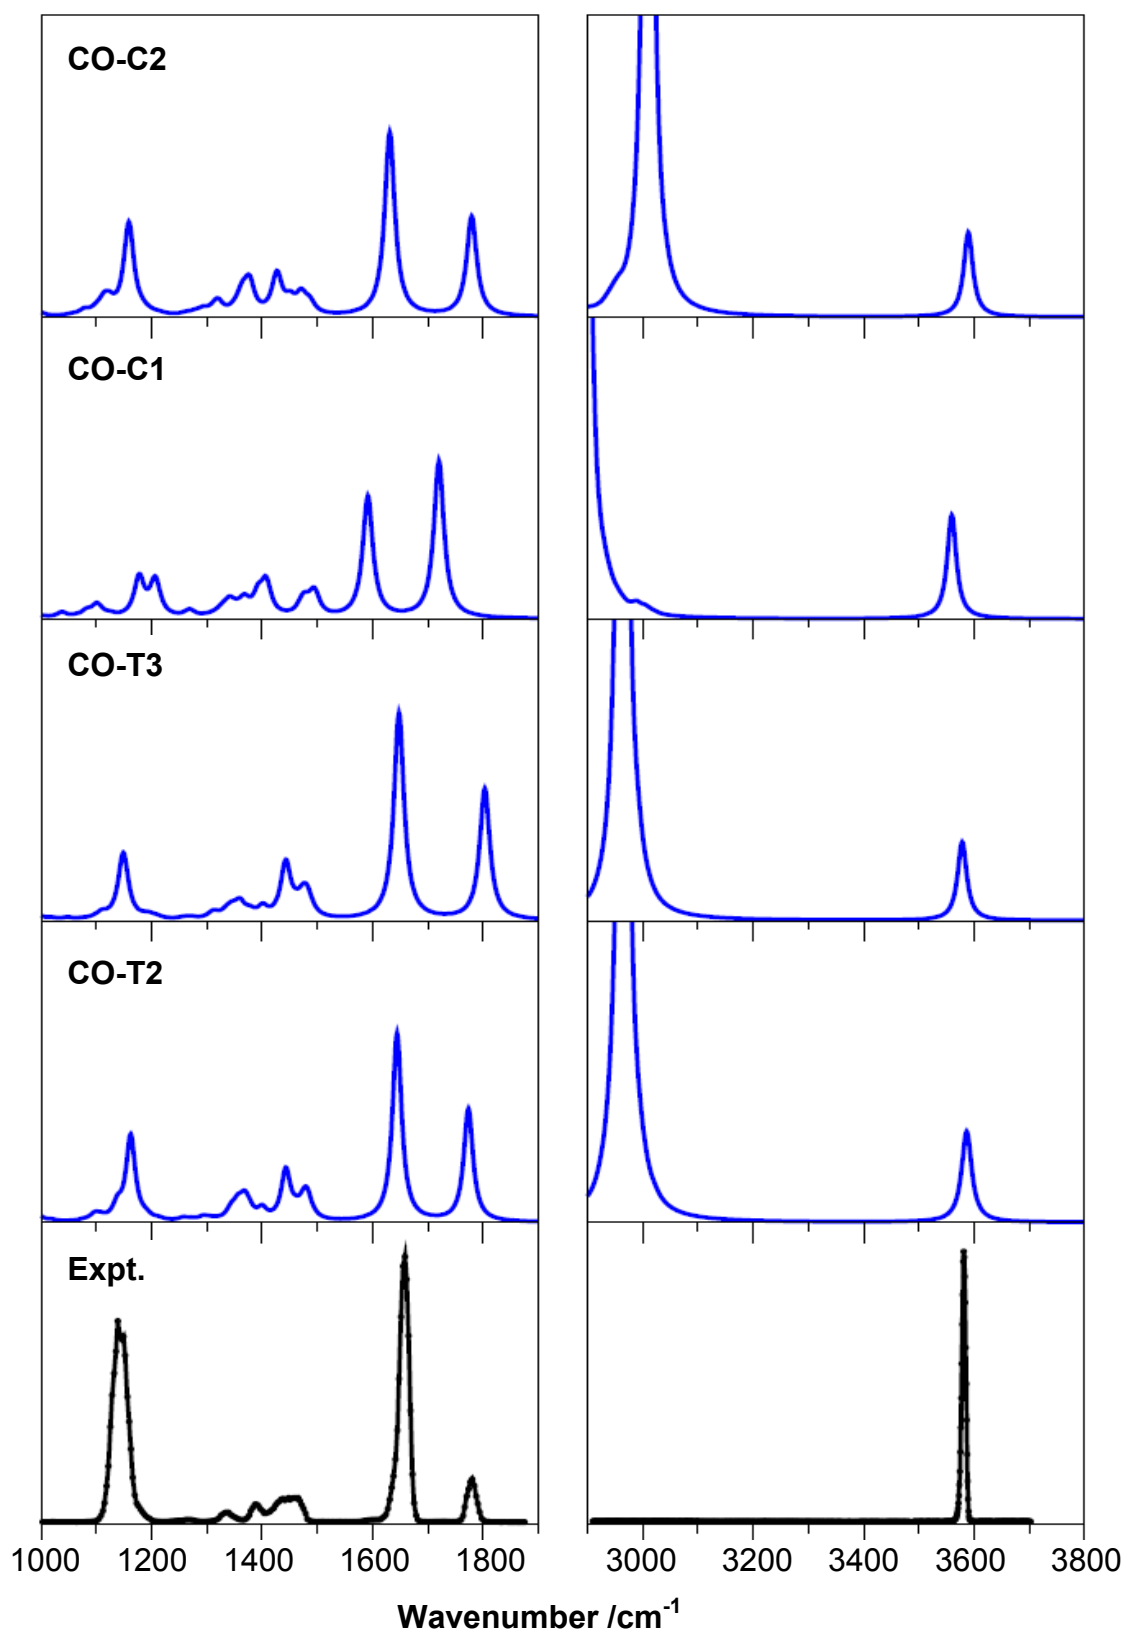

**Figure S3** Experimental IRMPD spectrum of  $\text{capH}^+$  (bottom) and calculated IR spectra (at the B3LYP/6-311+G\*\* level) of structures CO-T2, CO-T3, CO-C1, CO-C2.

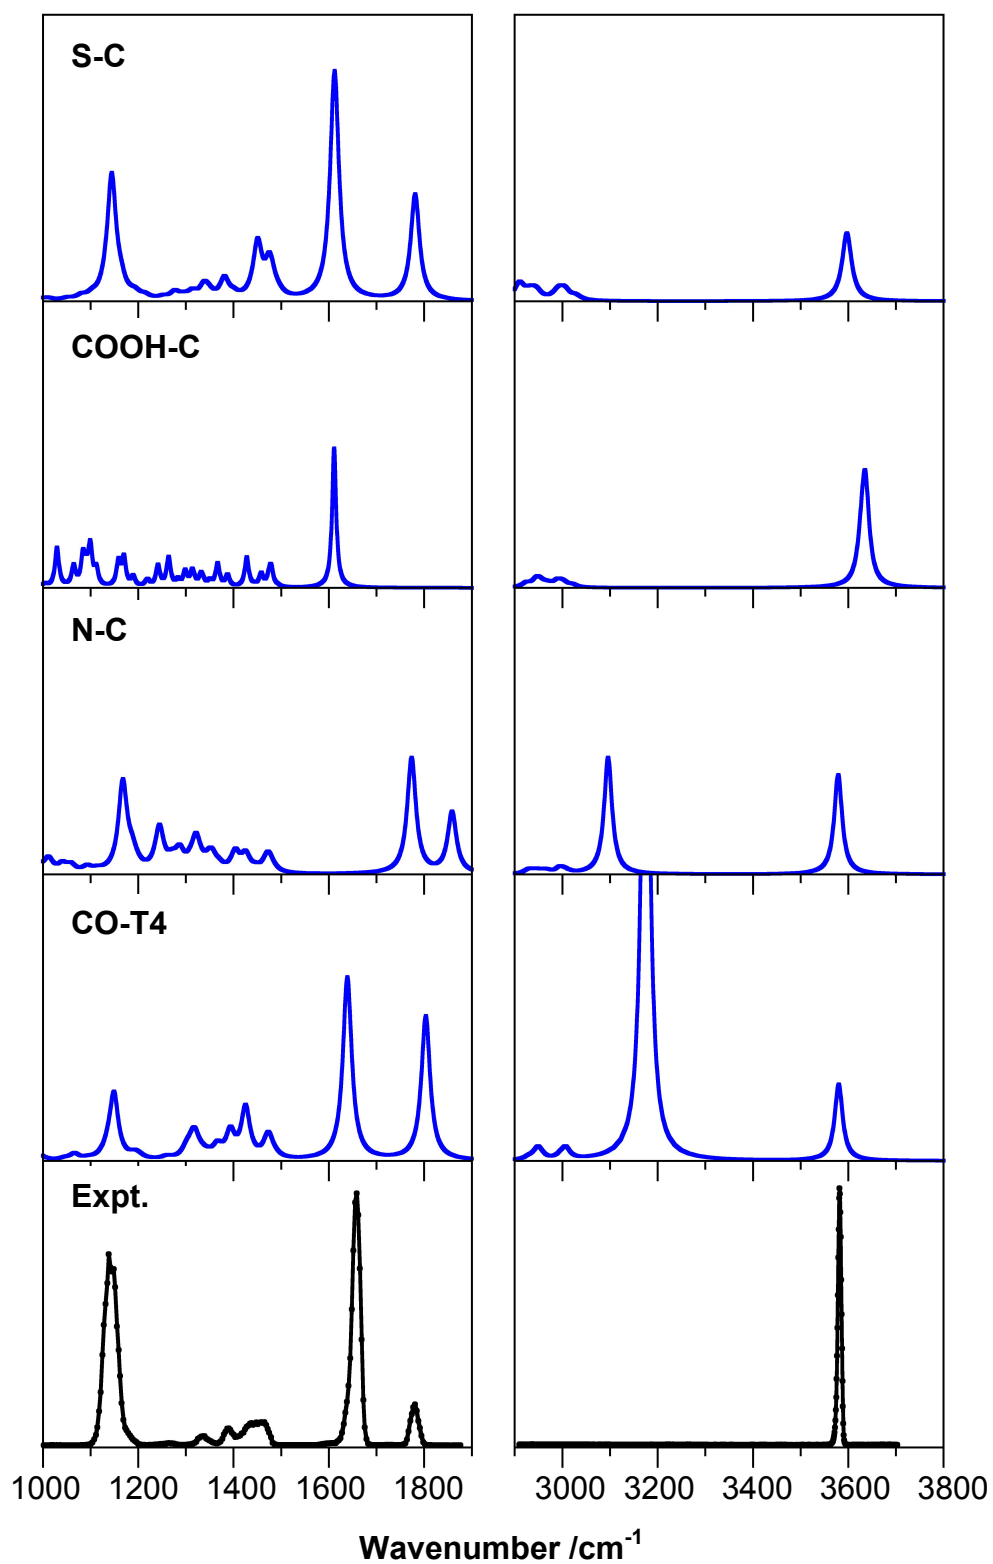

**Figure S4** Experimental IRMPD spectrum of  $\text{capH}^+$  (bottom) and calculated IR spectra (at the B3LYP/6-311+G\*\* level) of structures **CO-T4**, **N-C**, **COOH-C**, **S-C**.

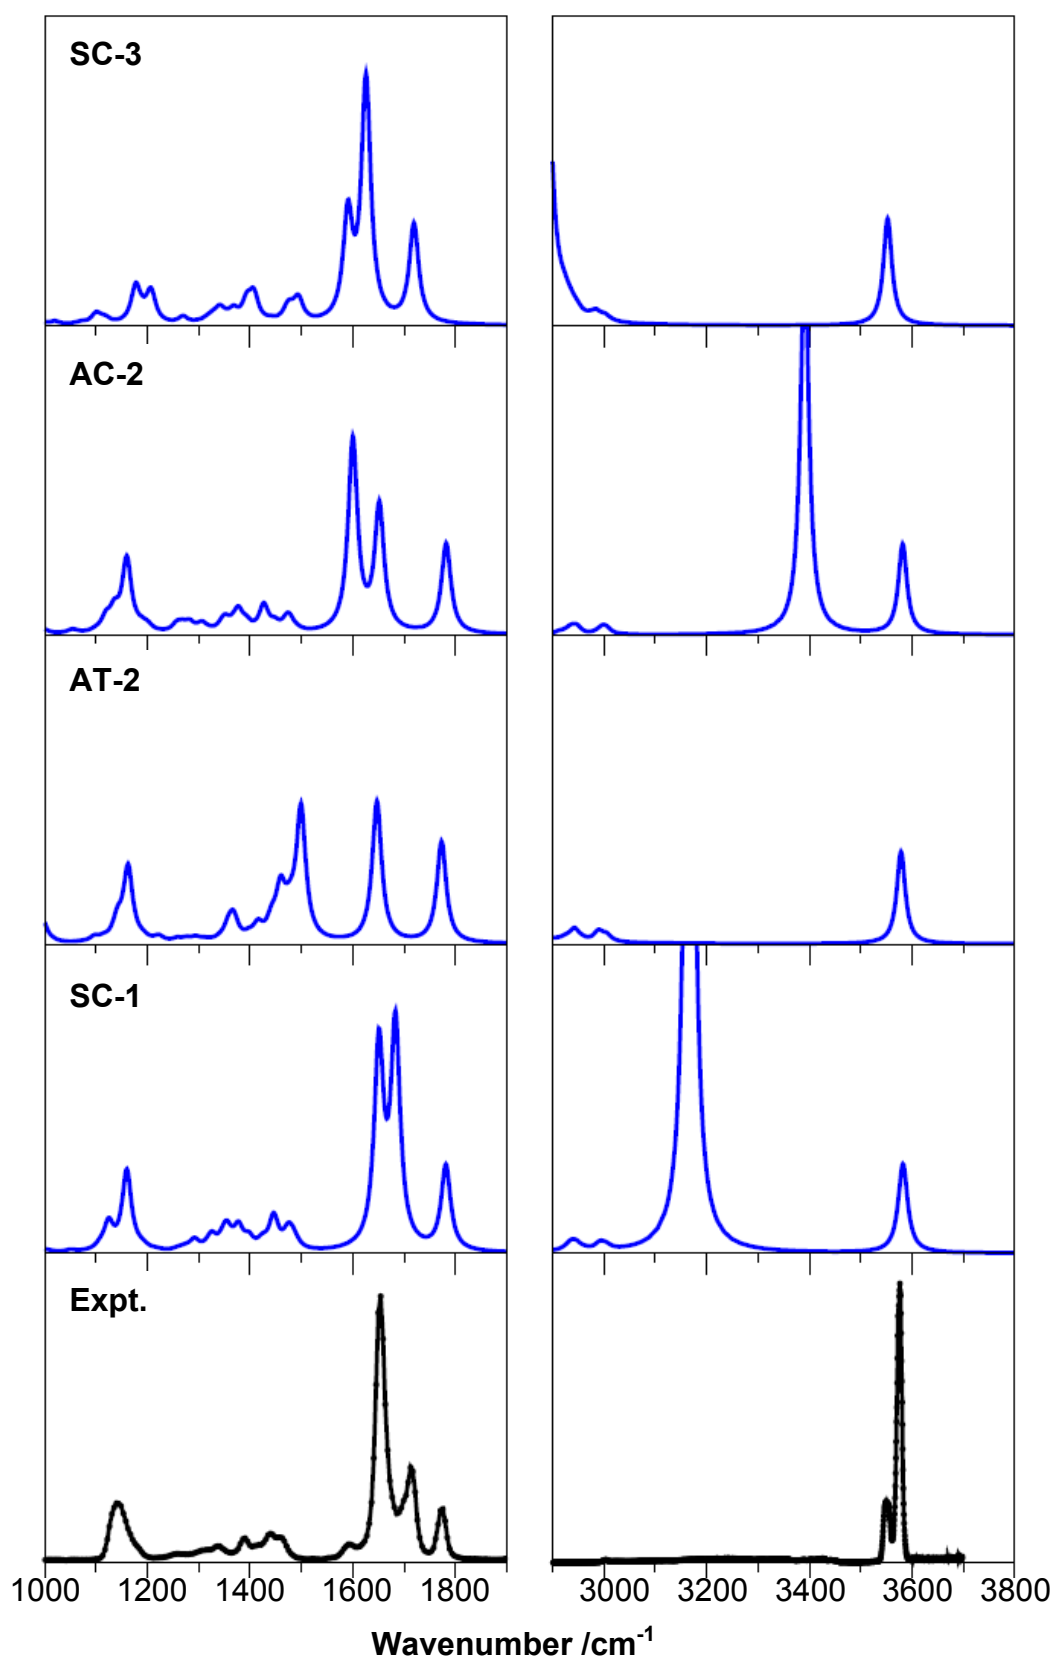

**Figure S5** Experimental IRMPD spectrum of SNOcapH<sup>+</sup> (bottom) and calculated IR spectra (at the B3LYP/6-311+G\*\* level) of isomers SC-1, AT-2, AC-2, SC-3.

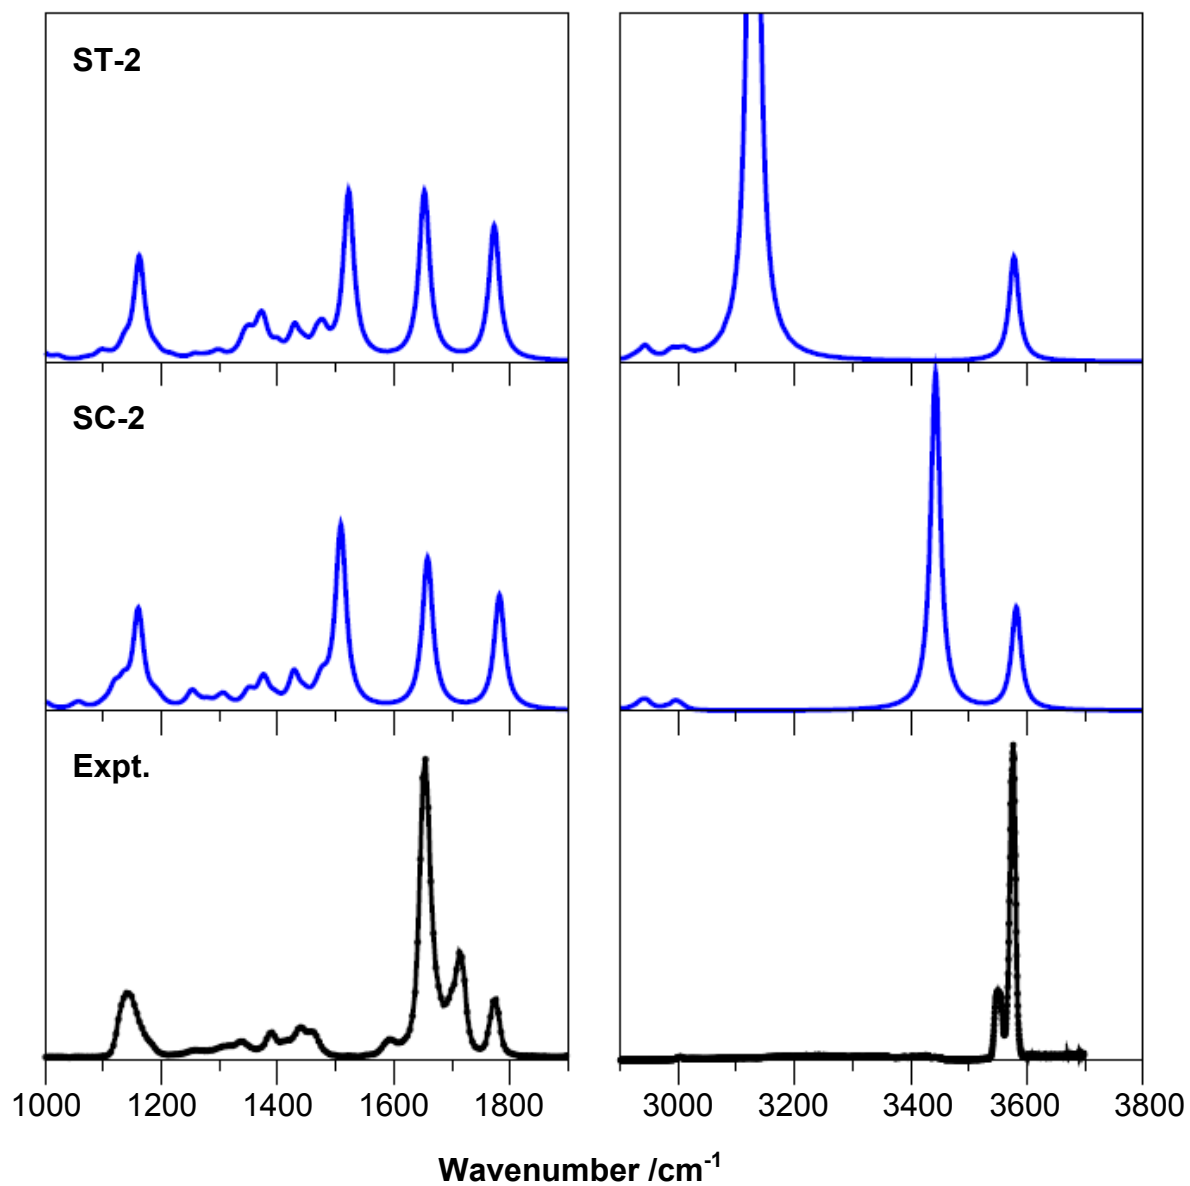

**Figure S6** Experimental IRMPD spectrum of SNOcapH<sup>+</sup> (bottom) and calculated IR spectra (at the B3LYP/6-311+G\*\* level) of isomers SC-2, ST-2.

**Reference Gaussian 03, Revision C.02**

Reference Gaussian 03, Revision C.02, M. J. Frisch, G. W. Trucks, H. B. Schlegel, G. E. Scuseria, M. A. Robb, J. R. Cheeseman, J. A. Montgomery, Jr., T. Vreven, K. N. Kudin, J. C. Burant, J. M. Millam, S. S. Iyengar, J. Tomasi, V. Barone, B. Mennucci, M. Cossi, G. Scalmani, N. Rega, G. A. Petersson, H. Nakatsuji, M. Hada, M. Ehara, K. Toyota, R. Fukuda, J. Hasegawa, M. Ishida, T. Nakajima, Y. Honda, O. Kitao, H. Nakai, M. Klene, X. Li, J. E. Knox, H. P. Hratchian, J. B. Cross, V. Bakken, C. Adamo, J. Jaramillo, R. Gomperts, R. E. Stratmann, O. Yazyev, A. J. Austin, R. Cammi, C. Pomelli, J. W. Ochterski, P. Y. Ayala, K. Morokuma, G. A. Voth, P. Salvador, J. J. Dannenberg, V. G. Zakrzewski, S. Dapprich, A. D. Daniels, M. C. Strain, O. Farkas, D. K. Malick, A. D. Rabuck, K. Raghavachari, J. B. Foresman, J. V. Ortiz, Q. Cui, A. G. Baboul, S. Clifford, J. Cioslowski, B. B. Stefanov, G. Liu, A. Liashenko, P. Piskorz, I. Komaromi, R. L. Martin, D. J. Fox, T. Keith, M. A. Al-Laham, C. Y. Peng, A. Nanayakkara, M. Challacombe, P. M. W. Gill, B. Johnson, W. Chen, M. W. Wong, C. Gonzalez, and J. A. Pople, Gaussian, Inc., Wallingford CT, 2004.
